# Supplementary material
Source: MDPI journal article supplement (https://www.mdpi.com/2077-1312/10/8/1102)
Supplement: s1 [file s1]

**Supplementary Table S1.** The numbers of individuals of fishes caught by the set net in the coastal waters of Yangyang from February 2007 to December 2008.

| Species                          | 2007    |      |         |      |        |      |        |      |        |      |
|----------------------------------|---------|------|---------|------|--------|------|--------|------|--------|------|
|                                  | Feb.    |      | Mar.    |      | Apr.   |      | May    |      | Jun.   |      |
|                                  | N       | %    | N       | %    | N      | %    | N      | %    | N      | %    |
| <b>Fishes</b>                    |         |      |         |      |        |      |        |      |        |      |
| <i>Scyliorhinus torazame</i>     |         |      | 6       | 0.0  |        |      |        |      | 37     | 0.2  |
| <i>Conger myriaster</i>          |         |      | 10      | 0.0  |        |      |        |      |        |      |
| <i>Engraulis japonicus</i>       |         |      |         |      | 250    | 0.5  | 500    | 0.8  |        |      |
| <i>Clupea pallasii</i>           |         |      | 106     | 0.1  |        |      | 426    | 0.6  |        |      |
| <i>Konosirus punctatus</i>       |         |      |         |      | 766    | 1.7  | 1,013  | 1.5  |        |      |
| <i>Tribolodon taczanowskii</i>   |         |      | 405     | 0.4  | 921    | 2.0  | 184    | 0.3  | 495    | 2.3  |
| <i>Oncorhynchus keta</i>         |         |      |         |      |        |      |        |      |        |      |
| <i>Oncorhynchus masou</i>        | 69      | 0.0  | 6,023   | 58.5 | 535    | 1.2  | 1,062  | 1.6  | 290    | 1.3  |
| <i>Gadus macrocephalus</i>       | 23      | 0.0  | 230     | 0.2  |        |      | 104    | 0.2  | 92     | 0.4  |
| <i>Lophomus setigerus</i>        | 188     | 0.1  | 1,127   | 1.1  | 721    | 1.6  | 975    | 1.5  | 518    | 2.4  |
| <i>Mugil cephalus</i>            | 103     | 0.0  | 2,751   | 2.7  | 5,889  | 12.8 | 11,627 | 17.5 | 3,682  | 17.0 |
| <i>Cololabis saira</i>           |         |      |         |      |        |      |        |      | 1,997  | 9.2  |
| <i>Cypselurus agoo</i>           |         |      |         |      |        |      |        |      |        |      |
| <i>Monocentris japonica</i>      |         |      |         |      |        |      |        |      |        |      |
| <i>Hypoptychus dybowskii</i>     |         |      |         |      |        |      |        |      | 240    | 1.1  |
| <i>Sebastes schlegelii</i>       | 58      | 0.0  | 152     | 0.1  | 392    | 0.8  | 1,077  | 1.6  | 521    | 2.4  |
| <i>Chelidonichthys spinosus</i>  |         |      |         |      |        |      |        |      |        |      |
| <i>Hexagrammos agrammus</i>      |         |      |         |      |        |      |        |      |        |      |
| <i>Pleurogrammus azonus</i>      | 33,486  | 26.4 | 71,176  | 69.2 | 10,375 | 22.5 | 10,583 | 15.9 | 483    | 2.2  |
| <i>Eumicrotremus orbis</i>       | 127     | 0.1  | 475     | 0.5  |        |      |        |      |        |      |
| <i>Lateolabrax japonicus</i>     | 20      | 0.0  |         |      | 151    | 0.3  | 80     | 0.1  |        |      |
| <i>Coryphaena hippurus</i>       |         |      |         |      |        |      |        |      |        |      |
| <i>Kaiwarinus equula</i>         |         |      |         |      |        |      |        |      |        |      |
| <i>Seriola lalandi</i>           |         |      |         |      | 29     | 0.0  | 495    | 0.7  | 494    | 2.3  |
| <i>Seriola quinqueradiata</i>    |         |      |         |      |        |      | 96     | 0.1  | 138    | 0.6  |
| <i>Trachurus japonicus</i>       |         |      |         |      |        |      |        |      |        |      |
| <i>Lobotes surinamensis</i>      |         |      |         |      |        |      |        |      |        |      |
| <i>Acanthopagrus schlegelii</i>  |         |      |         |      | 847    | 1.8  | 542    | 0.8  | 69     | 0.3  |
| <i>Dentex tumifrons</i>          |         |      |         |      |        |      |        |      | 23     | 0.1  |
| <i>Pagrus major</i>              |         |      | 1,086   | 1.1  | 284    | 0.6  | 306    | 0.5  | 69     | 0.3  |
| <i>Girella punctata</i>          |         |      |         |      |        |      |        |      |        |      |
| <i>Microcanthus strigatus</i>    |         |      |         |      |        |      |        |      |        |      |
| <i>Oplegnathus fasciatus</i>     |         |      | 311     | 0.3  | 110    | 0.2  | 190    | 0.3  | 140    | 0.6  |
| <i>Ditrema temminckii</i>        |         |      | 115     | 0.1  | 602    | 1.3  |        |      |        |      |
| <i>Semicossyphus reticulatus</i> | 5       | 0.0  |         |      |        |      |        |      |        |      |
| <i>Scomber japonicus</i>         |         |      |         |      |        |      | 23     | 0.0  | 242    | 1.1  |
| <i>Scomberomorus niphonius</i>   |         |      |         |      |        |      | 66     | 0.0  | 30     | 0.1  |
| <i>Hyperoglyphe japonica</i>     | 12      | 0.0  |         |      |        |      |        |      |        |      |
| <i>Psenopsis anomala</i>         |         |      |         |      |        |      |        |      |        |      |
| <i>Thunnus thynnus</i>           |         |      |         |      |        |      |        |      |        |      |
| <i>Pampus argenteus</i>          |         |      | 24      | 0.0  |        |      |        |      |        |      |
| <i>Paralichthys olivaceus</i>    |         |      | 278     | 0.3  | 1,667  | 3.6  | 2,149  | 3.2  | 279    | 1.3  |
| <i>Pleuronectes schrenki</i>     | 24      | 0.0  | 393     | 0.4  | 449    | 0.9  | 460    | 0.7  | 311    | 1.4  |
| <i>Pleuronichthys cornutus</i>   |         |      | 23      | 0.0  | 23     | 0.0  |        |      |        |      |
| <i>Stephanolepis cirrhifer</i>   | 70      | 0.0  | 271     | 0.3  | 754    | 1.6  | 2,842  | 4.3  | 368    | 1.7  |
| <i>Thamnaconus modestus</i>      |         |      |         |      |        |      |        |      |        |      |
| <i>Takifugu chinensis</i>        | 15      | 0.0  | 15      | 0.0  | 316    | 0.7  | 631    | 0.9  | 735    | 3.4  |
| <i>Mola mola</i>                 |         |      |         |      |        |      |        |      |        |      |
| <b>Cephalopods</b>               |         |      |         |      |        |      |        |      |        |      |
| <i>Enterotopus dofleini</i>      |         |      | 12      | 0.0  | 36     | 0.0  | 12     | 0.0  |        |      |
| <i>Loligo chinesis</i>           |         |      |         |      |        |      |        |      |        |      |
| <i>Todarodes pacificus</i>       | 92,552  | 73.0 | 17,865  | 17.4 | 21,055 | 45.6 | 31,129 | 46.8 | 10,435 | 48.1 |
| Total                            | 126,752 |      | 102,854 |      | 46,172 |      | 66,572 |      | 21,688 |      |
| Number of fishing day            | 12      |      | 28      |      | 28     |      | 31     |      | 28     |      |

**Supplementary Table S1. Continued.**

| Species                          | 2007          |      |               |      |              |                 |                |                  |               |      |
|----------------------------------|---------------|------|---------------|------|--------------|-----------------|----------------|------------------|---------------|------|
|                                  | Jul.          |      | Aug.          |      | Sep.         |                 | Oct.           |                  | Nov.          |      |
|                                  | N             | %    | N             | %    | N            | %               | N              | %                | N             | %    |
| <b>Fishes</b>                    |               |      |               |      |              |                 |                |                  |               |      |
| <i>Scyliorhinus torazame</i>     | 24            | 0.1  | 12            | 0.0  |              |                 |                |                  |               |      |
| <i>Conger myriaster</i>          | 10            | 0.0  |               |      |              |                 |                |                  | 10            | 0.0  |
| <i>Engraulis japonicus</i>       |               |      |               |      |              |                 |                |                  |               |      |
| <i>Clupea pallasii</i>           |               |      |               |      |              |                 |                |                  |               |      |
| <i>Konosirus punctatus</i>       | 45            | 0.3  |               |      |              |                 | 270            | 0.1              | 180           | 1.0  |
| <i>Tribolodon taczanowskii</i>   | 506           | 3.9  | 23            | 0.0  |              |                 | 92             | 0.0              | 23            | 0.1  |
| <i>Oncorhynchus keta</i>         | 20            | 0.1  | 1             | 0.0  | 25           | 0.8             | 1,793          | 1.3              | 112           | 0.6  |
| <i>Oncorhynchus masou</i>        | 23            | 0.1  |               |      |              |                 | 530            | 0.3              |               |      |
| <i>Gadus macrocephalus</i>       |               |      |               |      |              |                 |                |                  |               |      |
| <i>Lophomus setigerus</i>        | 30            | 0.2  | 75            | 0.1  |              |                 | 75             | 0.0              | 90            | 0.5  |
| <i>Mugil cephalus</i>            | 645           | 4.9  | 336           | 0.6  | 98           | 3.3             | 957            | 0.7              | 2,432         | 14.6 |
| <i>Cololabis saira</i>           | 473           | 3.6  |               |      |              |                 |                |                  |               |      |
| <i>Cypselurus agoo</i>           | 150           | 1.1  |               |      |              |                 |                |                  |               |      |
| <i>Monocentris japonica</i>      | 7             | 0.0  |               |      |              |                 |                |                  |               |      |
| <i>Hypoptychus dybowskii</i>     |               |      |               |      |              |                 |                |                  |               |      |
| <i>Sebastes schlegelii</i>       | 92            | 0.7  |               |      |              |                 | 23             | 0.0              | 523           | 3.1  |
| <i>Chelidonichthys spinosus</i>  |               |      |               |      |              |                 |                |                  | 45            | 0.2  |
| <i>Hexagrammos agrammus</i>      |               |      |               |      |              |                 |                |                  | 50            | 0.3  |
| <i>Pleurogrammus azonus</i>      |               |      |               |      |              |                 |                |                  |               |      |
| <i>Eumicrotremus orbis</i>       |               |      |               |      |              |                 | 1              | 0.0              | 46            | 0.2  |
| <i>Lateolabrax japonicus</i>     | 20            | 0.1  |               |      |              |                 |                |                  | 123           | 0.7  |
| <i>Coryphaena hippurus</i>       | 1             | 0.0  |               |      |              |                 |                |                  |               |      |
| <i>Kaiwarinus equula</i>         | 69            | 0.5  | 460           | 0.8  |              |                 |                |                  |               |      |
| <i>Seriola lalandi</i>           | 92            | 0.7  | 34            | 0.0  |              |                 | 92             | 0.0              | 21            | 0.1  |
| <i>Seriola quinqueradiata</i>    | 669           | 5.1  | 1,308         | 2.3  | 2,197        | 75.0            | 28,463         | 20.8             | 1,288         | 7.7  |
| <i>Trachurus japonicus</i>       |               |      | 2,352         | 4.3  |              |                 | 540            | 0.3              | 947           | 5.6  |
| <i>Lobotes surinamensis</i>      | 25            | 0.1  | 69            | 0.1  |              |                 |                |                  |               |      |
| <i>Acanthopagrus schlegelii</i>  | 83            | 0.6  |               |      | 23           | 0.7             | 581            | 0.4              | 138           | 0.8  |
| <i>Dentex tumifrons</i>          |               |      |               |      |              |                 |                |                  |               |      |
| <i>Pagrus major</i>              | 46            | 0.3  | 69            | 0.1  |              |                 | 2,024          | 1.4              | 69            | 0.4  |
| <i>Girella punctata</i>          |               |      | 23            | 0.0  |              |                 |                |                  |               |      |
| <i>Microcanthus strigatus</i>    |               |      |               |      |              |                 |                |                  |               |      |
| <i>Oplegnathus fasciatus</i>     | 24            | 0.1  | 46            | 0.0  |              |                 | 138            | 0.1              | 276           | 1.6  |
| <i>Ditrema temminckii</i>        |               |      |               |      |              |                 |                |                  |               |      |
| <i>Semicossyphus reticulatus</i> |               |      |               |      |              |                 |                |                  |               |      |
| <i>Scomber japonicus</i>         | 138           | 1.0  | 24,686        | 45.1 | 23           | 0.7             | 1,961          | 1.4              | 2,032         | 12.2 |
| <i>Scomberomorus niphonius</i>   | 9             | 0.0  | 349           | 0.6  |              |                 | 1,275          | 0.9              |               |      |
| <i>Hyperoglyphe japonica</i>     |               |      |               |      |              |                 | 36             | 0.0              | 79            | 0.4  |
| <i>Psenopsis anomala</i>         |               |      | 1,288         | 2.3  |              |                 | 414            | 0.3              | 115           | 0.6  |
| <i>Thunnus thynnus</i>           |               |      |               |      |              |                 |                |                  |               |      |
| <i>Pampus argenteus</i>          | 23            | 0.1  |               |      |              |                 |                |                  |               |      |
| <i>Paralichthys olivaceus</i>    | 284           | 2.1  | 193           | 0.3  | 92           | 3.1             | 322            | 0.2              | 500           | 3.0  |
| <i>Pleuronectes schrenki</i>     | 184           | 1.4  | 46            | 0.0  |              |                 |                |                  |               |      |
| <i>Pleuronichthys cornutus</i>   |               |      |               |      |              |                 |                |                  | 23            | 0.1  |
| <i>Stephanolepis cirrifer</i>    | 127           | 0.9  | 14,957        | 27.3 | 297          | 10.1            | 7,104          | 5.2              | 3,993         | 24.0 |
| <i>Thamnaconus modestus</i>      |               |      |               |      |              |                 | 92             | 0.0              | 126           | 0.7  |
| <i>Takifugu chinensis</i>        | 390           | 3.0  | 60            | 0.1  |              |                 | 130            | 0.0              | 60            | 0.3  |
| <i>Mola mola</i>                 |               |      |               |      |              |                 |                |                  | 3             | 0.0  |
| <b>Cephalopods</b>               |               |      |               |      |              |                 |                |                  |               |      |
| <i>Enteroctopus dofleini</i>     |               |      |               |      |              |                 |                |                  | 12            | 0.0  |
| <i>Loligo chinensis</i>          | 70            | 0.5  |               |      |              |                 |                |                  | 71            | 0.4  |
| <i>Todarodes pacificus</i>       | 8,684         | 66.9 | 8,283         | 15.1 | 173          | 5.9             | 89,616         | 65.6             | 3,237         | 19.4 |
| <b>Total</b>                     | <b>12,964</b> |      | <b>54,670</b> |      | <b>2,928</b> | <b>16,951.3</b> | <b>136,534</b> | <b>256,640.0</b> | <b>16,624</b> |      |
| <b>Number of fishing day</b>     | <b>25</b>     |      | <b>29</b>     |      | <b>2</b>     |                 | <b>30</b>      |                  | <b>17</b>     |      |

**Supplementary Table S1. Continued.**

| Species                          | 2007          |      | 2008           |      |               |      |               |      |              |                |
|----------------------------------|---------------|------|----------------|------|---------------|------|---------------|------|--------------|----------------|
|                                  | Dec.          |      | Jan.           |      | Feb.          |      | Mar.          |      | Apr.         |                |
|                                  | N             | %    | N              | %    | N             | %    | N             | %    | N            | %              |
| <b>Fishes</b>                    |               |      |                |      |               |      |               |      |              |                |
| <i>Scyliorhinus torazame</i>     |               |      |                |      |               |      |               |      |              |                |
| <i>Conger myriaster</i>          | 30            | 0.0  |                |      |               |      | 10            | 0.0  |              |                |
| <i>Engraulis japonicus</i>       |               |      |                |      |               |      |               |      |              |                |
| <i>Clupea pallasii</i>           |               |      |                |      | 23            | 0.1  | 69            | 0.1  |              |                |
| <i>Konosirus punctatus</i>       | 1,800         | 2.8  |                |      |               |      |               |      |              |                |
| <i>Tribolodon taczanowskii</i>   |               |      | 92             | 0.0  | 23            | 0.1  | 1,476         | 3.0  | 230          | 4.9            |
| <i>Oncorhynchus keta</i>         |               |      |                |      |               |      |               |      |              |                |
| <i>Oncorhynchus masou</i>        |               |      | 133            | 0.1  | 6,853         | 42.2 | 11,123        | 22.8 | 212          | 4.5            |
| <i>Gadus macrocephalus</i>       |               |      | 23             | 0.0  | 240           | 1.4  | 161           | 0.3  | 23           | 0.4            |
| <i>Lophomus setigerus</i>        | 225           | 0.3  | 75             | 0.0  | 165           | 1.0  | 1,155         | 2.3  | 195          | 4.1            |
| <i>Mugil cephalus</i>            | 706           | 1.1  | 502            | 0.4  | 175           | 1.0  | 3,756         | 7.7  | 1,498        | 31.9           |
| <i>Cololabis saira</i>           |               |      |                |      |               |      |               |      |              |                |
| <i>Cypelurus agoo</i>            |               |      |                |      |               |      |               |      |              |                |
| <i>Monocentris japonica</i>      |               |      |                |      |               |      |               |      |              |                |
| <i>Hypoptychus dybowskii</i>     |               |      |                |      |               |      |               |      |              |                |
| <i>Sebastes schlegelii</i>       | 2,916         | 4.6  | 448            | 0.4  | 115           | 0.7  | 207           | 0.4  | 207          | 4.4            |
| <i>Chelidonichthys spinosus</i>  | 45            | 0.0  |                |      |               |      |               |      |              |                |
| <i>Hexagrammos agrammus</i>      |               |      |                |      |               |      |               |      |              |                |
| <i>Pleurogrammus azonus</i>      |               |      | 23             | 0.0  | 69            | 0.4  | 27,302        | 56.1 | 161          | 3.4            |
| <i>Eumicrotremus orbis</i>       | 207           | 0.3  | 552            | 0.5  | 230           | 1.4  | 184           | 0.3  | 23           | 0.4            |
| <i>Lateolabrax japonicus</i>     | 102.0         | 0.1  | 28.0           | 0.0  | 20            | 0.1  | 162           | 0.3  | 80           | 1.7            |
| <i>Coryphaena hippurus</i>       |               |      |                |      |               |      |               |      |              |                |
| <i>Kaiwarinus equula</i>         | 23            | 0.0  |                |      |               |      |               |      |              |                |
| <i>Seriola lalandi</i>           | 4             | 0.0  |                |      |               |      |               |      |              |                |
| <i>Seriola quinqueradiata</i>    | 10,210        | 16.2 | 4,882          | 4.7  | 2             | 0.0  |               |      |              |                |
| <i>Trachurus japonicus</i>       |               |      |                |      |               |      |               |      |              |                |
| <i>Lobotes surinamensis</i>      |               |      |                |      |               |      |               |      |              |                |
| <i>Acanthopagrus schlegelii</i>  |               |      |                |      |               |      | 1             | 0.0  |              |                |
| <i>Dentex tumifrons</i>          |               |      |                |      |               |      |               |      |              |                |
| <i>Pagrus major</i>              | 23            | 0.0  | 23             | 0.0  |               |      |               |      | 117          | 2.4            |
| <i>Girella punctata</i>          |               |      |                |      |               |      |               |      |              |                |
| <i>Microcanthus strigatus</i>    |               |      |                |      |               |      |               |      |              |                |
| <i>Oplegnathus fasciatus</i>     | 161           | 0.2  | 46             | 0.0  |               |      | 23            | 0.0  | 47           | 1.0            |
| <i>Ditrema temminckii</i>        | 69            | 0.1  | 69             | 0.0  |               |      |               |      | 115          | 2.4            |
| <i>Semicossyphus reticulatus</i> |               |      |                |      |               |      |               |      |              |                |
| <i>Scomber japonicus</i>         | 207           | 0.3  | 23             | 0.0  |               |      |               |      |              |                |
| <i>Scomberomorus niphonius</i>   |               |      |                |      |               |      |               |      |              |                |
| <i>Hyperoglyphe japonica</i>     | 116           | 0.1  | 380            | 0.3  |               |      |               |      |              |                |
| <i>Psenopsis anomala</i>         |               |      |                |      |               |      |               |      |              |                |
| <i>Thunnus thynnus</i>           |               |      |                |      |               |      |               |      |              |                |
| <i>Pampus argenteus</i>          |               |      |                |      |               |      |               |      |              |                |
| <i>Paralichthys olivaceus</i>    | 621           | 0.9  | 138            | 0.1  |               |      | 262           | 0.5  | 265          | 5.6            |
| <i>Pleuronectes schrenki</i>     | 161           | 0.2  | 92             | 0.0  | 69            | 0.4  | 437           | 0.8  | 161          | 3.4            |
| <i>Pleuronichthys cornutus</i>   | 23            | 0.0  |                |      | 23            | 0.1  | 184           | 0.3  | 23           | 0.4            |
| <i>Stephanolepis cirrifer</i>    | 2,035         | 3.2  | 69             | 0.0  | 158           | 0.9  | 681           | 1.4  | 384          | 8.1            |
| <i>Thamnaconus modestus</i>      |               |      |                |      |               |      |               |      |              |                |
| <i>Takifugu chinensis</i>        | 300           | 0.4  |                |      | 111           | 0.6  | 1,277         | 2.6  | 120          | 2.5            |
| <i>Mola mola</i>                 | 2             | 0.0  |                |      |               |      |               |      |              |                |
| <b>Cephalopods</b>               |               |      |                |      |               |      |               |      |              |                |
| <i>Enteroctopus dofleini</i>     | 41            | 0.0  | 24             | 0.0  |               |      | 41            | 0.0  |              |                |
| <i>Loligo chinensis</i>          | 70            | 0.1  | 140            | 0.1  | 210           | 1.2  | 70            | 0.1  | 70           | 1.4            |
| <i>Todarodes pacificus</i>       | 42,832        | 68.0 | 95,440         | 92.4 | 7,751         | 47.7 |               |      | 759          | 16.1           |
| <b>Total</b>                     | <b>62,927</b> |      | <b>103,214</b> |      | <b>16,238</b> |      | <b>48,581</b> |      | <b>4,690</b> | <b>3,057.9</b> |
| <b>Number of fishing day</b>     | <b>21</b>     |      | <b>17</b>      |      | <b>16</b>     |      | <b>25</b>     |      | <b>12</b>    |                |

**Supplementary Table S1. Continued.**

| Species                          | 2008          |      |               |      |               |      |               |      |                |      |
|----------------------------------|---------------|------|---------------|------|---------------|------|---------------|------|----------------|------|
|                                  | May           |      | Jun.          |      | Jul.          |      | Aug.          |      | Sep.           |      |
|                                  | N             | %    | N             | %    | N             | %    | N             | %    | N              | %    |
| <b>Fishes</b>                    |               |      |               |      |               |      |               |      |                |      |
| <i>Scyliorhinus torazame</i>     |               |      |               |      | 1             | 0.0  | 1             | 0.0  | 12             | 0.0  |
| <i>Conger myriaster</i>          |               |      |               |      |               |      |               |      | 40             | 0.0  |
| <i>Engraulis japonicus</i>       |               |      |               |      |               |      |               |      |                |      |
| <i>Clupea pallasii</i>           |               |      |               |      |               |      |               |      |                |      |
| <i>Konosirus punctatus</i>       | 90            | 0.0  | 1,176         | 4.1  | 1,080         | 6.3  |               |      | 270            | 0.1  |
| <i>Tribolodon taczanowskii</i>   | 184           | 0.2  | 506           | 1.7  | 276           | 1.6  | 92            | 0.5  |                |      |
| <i>Oncorhynchus keta</i>         |               |      |               |      |               |      |               |      | 126            | 0.0  |
| <i>Oncorhynchus masou</i>        | 46            | 0.0  | 47            | 0.1  |               |      |               |      |                |      |
| <i>Gadus macrocephalus</i>       |               |      |               |      |               |      |               |      |                |      |
| <i>Lophomus setigerus</i>        | 480           | 0.5  | 300           | 1.0  | 75            | 0.4  |               |      |                |      |
| <i>Mugil cephalus</i>            | 3,302         | 3.6  | 2,224         | 7.8  | 828           | 4.8  | 35            | 0.2  | 30             | 0.0  |
| <i>Cololabis saira</i>           | 506           | 0.5  | 1,219         | 4.3  | 1,526         | 8.9  |               |      |                |      |
| <i>Cypselurus agoo</i>           |               |      | 50            | 0.1  |               |      |               |      |                |      |
| <i>Monocentris japonica</i>      |               |      |               |      |               |      |               |      |                |      |
| <i>Hypoptychus dybowskii</i>     |               |      |               |      |               |      |               |      |                |      |
| <i>Sebastes schlegelii</i>       | 828           | 0.9  | 483           | 1.7  |               |      |               |      |                |      |
| <i>Chelidonichthys spinosus</i>  | 855           | 0.9  | 1,139         | 4.0  | 765           | 4.4  |               |      |                |      |
| <i>Hexagrammos agrammus</i>      |               |      |               |      |               |      |               |      |                |      |
| <i>Pleurogrammus azonus</i>      | 150           | 0.1  | 23            | 0.0  |               |      |               |      |                |      |
| <i>Eumicrotremus orbis</i>       |               |      |               |      |               |      |               |      |                |      |
| <i>Lateolabrax japonicus</i>     | 20            | 0.0  |               |      |               |      | 1             | 0.0  |                |      |
| <i>Coryphaena hippurus</i>       |               |      |               |      |               |      |               |      |                |      |
| <i>Kaiwarinus equula</i>         |               |      |               |      |               |      | 23            | 0.1  | 23             | 0.0  |
| <i>Seriola lalandi</i>           | 127           | 0.1  | 145           | 0.5  | 58            | 0.3  | 11            | 0.0  | 6              | 0.0  |
| <i>Seriola quinqueradiata</i>    | 232           | 0.2  | 58            | 0.2  | 323           | 1.8  | 979           | 5.8  | 3,924          | 2.3  |
| <i>Trachurus japonicus</i>       |               |      |               |      |               |      |               |      |                |      |
| <i>Lobotes surinamensis</i>      |               |      |               |      | 48            | 0.2  |               |      |                |      |
| <i>Acanthopagrus schlegelii</i>  | 971           | 1.0  | 207           | 0.7  | 138           | 0.8  | 46            | 0.2  | 69             | 0.0  |
| <i>Dentex tumifrons</i>          |               |      |               |      |               |      |               |      |                |      |
| <i>Pagrus major</i>              | 122           | 0.1  | 8             | 0.0  |               |      |               |      | 46             | 0.0  |
| <i>Girella punctata</i>          |               |      |               |      |               |      |               |      |                |      |
| <i>Microcanthus strigatus</i>    |               |      |               |      |               |      |               |      | 100            | 0.0  |
| <i>Oplegnathus fasciatus</i>     | 207           | 0.2  | 115           | 0.4  |               |      |               |      | 69             | 0.0  |
| <i>Ditrema temminckii</i>        |               |      |               |      |               |      |               |      |                |      |
| <i>Semicossyphus reticulatus</i> |               |      |               |      |               |      |               |      |                |      |
| <i>Scomber japonicus</i>         | 184           | 0.2  | 269           | 0.9  | 173           | 1.0  | 13,074        | 78.7 | 53,184         | 31.4 |
| <i>Scomberomorus niphonius</i>   | 113           | 0.1  | 251           | 0.8  | 93            | 0.5  | 3             | 0.0  | 1,171          | 0.6  |
| <i>Hyperoglyphe japonica</i>     |               |      |               |      |               |      |               |      | 161            | 0.0  |
| <i>Psenopsis anomala</i>         |               |      |               |      |               |      |               |      |                |      |
| <i>Thunnus thynnus</i>           |               |      | 3             | 0.0  |               |      |               |      |                |      |
| <i>Pampus argenteus</i>          |               |      |               |      |               |      |               |      |                |      |
| <i>Paralichthys olivaceus</i>    | 519           | 0.5  | 445           | 1.5  | 823           | 4.8  | 829           | 4.9  | 557            | 0.3  |
| <i>Pleuronectes schrenki</i>     | 506           | 0.5  | 92            | 0.3  | 460           | 2.6  | 23            | 0.1  |                |      |
| <i>Pleuronichthys cornutus</i>   | 1             | 0.0  |               |      |               |      |               |      |                |      |
| <i>Stephanolepis cirrifer</i>    | 1,478         | 1.6  | 299           | 1.0  | 115           | 0.6  | 322           | 1.9  | 422            | 0.2  |
| <i>Thamnaconus modestus</i>      |               |      |               |      |               |      |               |      | 110            | 0.0  |
| <i>Takifugu chinensis</i>        | 573           | 0.6  | 770           | 2.7  | 270           | 1.5  | 60            | 0.3  | 120            | 0.0  |
| <i>Mola mola</i>                 |               |      |               |      |               |      |               |      | 1              | 0.0  |
| <b>Cephalopods</b>               |               |      |               |      |               |      |               |      |                |      |
| <i>Enteroctopus dofleini</i>     |               |      |               |      |               |      |               |      |                |      |
| <i>Loligo chinensis</i>          |               |      |               |      |               |      |               |      | 70             | 0.0  |
| <i>Todarodes pacificus</i>       | 78,806        | 87.2 | 18,404        | 65.1 | 10,081        | 58.8 | 1,035         | 6.2  | 108,431        | 64.1 |
| <b>Total</b>                     | <b>90,301</b> |      | <b>28,232</b> |      | <b>17,138</b> |      | <b>16,603</b> |      | <b>168,942</b> |      |
| <b>Number of fishing day</b>     | <b>21</b>     |      | <b>22</b>     |      | <b>6</b>      |      | <b>21</b>     |      | <b>12</b>      |      |

**Supplementary Table S1. Continued.**

| Species                          | 2008   |      |         |      |        |      | Total     |      |
|----------------------------------|--------|------|---------|------|--------|------|-----------|------|
|                                  | Oct.   |      | Nov.    |      | Dec.   |      |           |      |
|                                  | N      | %    | N       | %    | N      | %    | N         | %    |
| <b>Fishes</b>                    |        |      |         |      |        |      |           |      |
| <i>Scyliorhinus torazame</i>     | 2      | 0.0  | 12      | 0.0  |        |      | 107       | 0.0  |
| <i>Conger myriaster</i>          |        |      | 20      | 0.0  | 20     | 0.0  | 150       | 0.0  |
| <i>Engraulis japonicus</i>       |        |      |         |      | 4,167  | 14.0 | 4,917     | 0.3  |
| <i>Clupea pallasii</i>           |        |      |         |      |        |      | 624       | 0.0  |
| <i>Konosirus punctatus</i>       | 630    | 0.7  | 810     | 0.5  |        |      | 8,130     | 0.5  |
| <i>Tribolodon taczanowskii</i>   |        |      | 23      | 0.0  | 92     | 0.3  | 5,643     | 0.4  |
| <i>Oncorhynchus keta</i>         | 1,205  | 1.3  | 124     | 0.0  |        |      | 3,406     | 0.2  |
| <i>Oncorhynchus masou</i>        |        |      |         |      |        |      | 26,947    | 1.9  |
| <i>Gadus macrocephalus</i>       |        |      | 23      | 0.0  |        |      | 919       | 0.0  |
| <i>Lophiomus setigerus</i>       | 135    | 0.1  | 287     | 0.2  | 255    | 0.8  | 7,146     | 0.5  |
| <i>Mugil cephalus</i>            | 734    | 0.8  | 290     | 0.2  | 30     | 0.1  | 42,630    | 3.0  |
| <i>Cololabis saira</i>           |        |      |         |      |        |      | 5,721     | 0.4  |
| <i>Cypselurus agoo</i>           |        |      |         |      |        |      | 200       | 0.0  |
| <i>Monocentris japonica</i>      | 13     | 0.0  |         |      |        |      | 20        | 0.0  |
| <i>Hypoptychus dybowskii</i>     |        |      |         |      |        |      | 241       | 0.0  |
| <i>Sebastes schlegelii</i>       | 23     | 0.0  | 2,568   | 1.8  | 1,024  | 3.4  | 11,657    | 0.8  |
| <i>Chelidonichthys spinosus</i>  | 45     | 0.0  | 540     | 0.3  | 135    | 0.4  | 3,569     | 0.2  |
| <i>Hexagrammos agrammus</i>      |        |      |         |      |        |      | 50        | 0.0  |
| <i>Pleurogrammus azonus</i>      |        |      | 69      | 0.0  |        |      | 153,900   | 10.9 |
| <i>Eumicrotremus orbis</i>       | 23     | 0.0  | 69      | 0.0  | 69     | 0.2  | 2,006     | 0.1  |
| <i>Lateolabrax japonicus</i>     | 100    | 0.1  | 120     | 0.0  | 61     | 0.2  | 1,098     | 0.0  |
| <i>Coryphaena hippurus</i>       |        |      |         |      |        |      | 1         | 0.0  |
| <i>Kaiwarinus equula</i>         |        |      | 69      | 0.0  |        |      | 667       | 0.0  |
| <i>Seriola lalandi</i>           | 106    | 0.1  | 18      | 0.0  |        |      | 1,732     | 0.1  |
| <i>Seriola quinqueradiata</i>    | 13,284 | 15.3 | 23,391  | 16.4 | 5,310  | 17.9 | 96,759    | 6.8  |
| <i>Trachurus japonicus</i>       |        |      | 56,880  | 40.0 | 45     | 0.1  | 60,764    | 4.3  |
| <i>Lobotes surinamensis</i>      | 24     | 0.0  |         |      |        |      | 166       | 0.0  |
| <i>Acanthopagrus schlegelii</i>  | 184    | 0.2  | 1,904   | 1.3  | 23     | 0.0  | 5,826     | 0.4  |
| <i>Dentex tumifrons</i>          |        |      |         |      |        |      | 23        | 0.0  |
| <i>Pagrus major</i>              | 70     | 0.0  | 605     | 0.4  |        |      | 4,967     | 0.3  |
| <i>Girella punctata</i>          |        |      | 23      | 0.0  | 46     | 0.1  | 92        | 0.0  |
| <i>Microcanthus strigatus</i>    | 300    | 0.3  | 80      | 0.0  |        |      | 480       | 0.0  |
| <i>Oplegnathus fasciatus</i>     | 47     | 0.0  | 115     | 0.0  | 46     | 0.1  | 2,111     | 0.1  |
| <i>Ditrema temminckii</i>        |        |      |         |      |        |      | 970       | 0.0  |
| <i>Semicossyphus reticulatus</i> |        |      |         |      |        |      | 5         | 0.0  |
| <i>Scomber japonicus</i>         | 5,429  | 6.2  | 4,386   | 3.0  | 3,266  | 11.0 | 109,300   | 7.7  |
| <i>Scomberomorus niphonius</i>   | 536    | 0.6  | 390     | 0.2  |        |      | 4,286     | 0.3  |
| <i>Hyperoglyphe japonica</i>     | 623    | 0.7  | 8,459   | 5.9  | 757    | 2.5  | 10,623    | 0.7  |
| <i>Psenopsis anomala</i>         | 69     | 0.0  |         |      |        |      | 1,955     | 0.1  |
| <i>Thunnus thynnus</i>           | 3,590  | 4.1  |         |      |        |      | 3593      | 0.2  |
| <i>Pampus argenteus</i>          |        |      |         |      |        |      | 47        | 0.0  |
| <i>Paralichthys olivaceus</i>    | 483    | 0.5  | 3,633   | 2.5  | 345    | 1.1  | 14,688    | 1.0  |
| <i>Pleuronectes schrenki</i>     |        |      | 23      | 0.0  | 69     | 0.2  | 3,960     | 0.2  |
| <i>Pleuronichthys cornutus</i>   |        |      | 69      | 0.0  |        |      | 392       | 0.0  |
| <i>Stephanolepis cirrifer</i>    | 2,790  | 3.2  | 8,223   | 5.7  | 492    | 1.6  | 48,251    | 3.4  |
| <i>Thamnaconus modestus</i>      | 19,936 | 23.0 | 708     | 0.4  | 69     | 0.2  | 20.7      | 1.5  |
| <i>Takifugu chinensis</i>        | 210    | 0.2  | 15,113  | 10.6 | 2,398  | 8.0  | 23,674    | 1.6  |
| <i>Mola mola</i>                 | 3      | 0.0  | 5       | 0.0  | 2      | 0.0  | 16        | 0.0  |
| <b>Cephalopods</b>               |        |      |         |      |        |      |           |      |
| <i>Enteroctopus dofleini</i>     |        |      |         |      | 19     | 0.0  | 197       | 0.0  |
| <i>Loligo chinensis</i>          | 140    | 0.1  | 210     | 0.1  | 70     | 0.2  | 1,191     | 0.0  |
| <i>Todarodes pacificus</i>       | 35,791 | 41.3 | 12,667  | 8.9  | 10,823 | 36.5 | 705,851   | 50.3 |
| Total                            | 86,526 |      | 141,926 |      | 29,633 |      | 1,402,709 |      |
| Number of fishing day            | 27     |      | 23      |      | 18     |      | 471       |      |
